# Supplementary material for: Multi-decadal (1953–2017) rock glacier kinematics analysed by high-resolution topographic data in the upper Kaunertal, Austria
Source: Copernicus journal article supplement (doi:10.5194/tc-15-5345-2021), 2021-12-06
Supplement: Supplementary file 1 [file tc-15-5345-2021-supplement.zip]

Archive with 3 entries (3 files):
- tc-15-5345-2021-supplement-title-page.pdf
- RockGlaciers_Fleischer_et_al_2021.kml
- Supplementary.pdf
