# Supplementary material for: Multi-decadal (1953–2017) rock glacier kinematics analysed by high-resolution topographic data in the upper Kaunertal, Austria
Source: Copernicus journal article supplement (doi:10.5194/tc-15-5345-2021), 2021-12-06
Supplement: Supplementary file 1 [file tc-15-5345-2021-supplement.zip › RockGlaciers_Fleischer_et_al_2021.kml]

<?xml version="1.0" encoding="UTF-8"?>
<kml xmlns="http://www.opengis.net/kml/2.2" xmlns:gx="http://www.google.com/kml/ext/2.2" xmlns:kml="http://www.opengis.net/kml/2.2" xmlns:atom="http://www.w3.org/2005/Atom">
<Document>
	<name>Studied rock glaciers Kaunertal</name>
	<gx:CascadingStyle kml:id="__managed_style_278EB2539D1AFC91C8F6">
		<Style>
			<IconStyle>
				<scale>1.2</scale>
				<Icon>
					<href>https://earth.google.com/earth/rpc/cc/icon?color=1976d2&amp;id=2000&amp;scale=4</href>
				</Icon>
				<hotSpot x="64" y="128" xunits="pixels" yunits="insetPixels"/>
			</IconStyle>
			<LabelStyle>
			</LabelStyle>
			<LineStyle>
				<color>ff2dc0fb</color>
				<width>4.8</width>
			</LineStyle>
			<PolyStyle>
				<color>40ffffff</color>
			</PolyStyle>
			<BalloonStyle>
				<displayMode>hide</displayMode>
			</BalloonStyle>
		</Style>
	</gx:CascadingStyle>
	<gx:CascadingStyle kml:id="__managed_style_160E81DCE21AFC91C8F6">
		<Style>
			<IconStyle>
				<Icon>
					<href>https://earth.google.com/earth/rpc/cc/icon?color=1976d2&amp;id=2000&amp;scale=4</href>
				</Icon>
				<hotSpot x="64" y="128" xunits="pixels" yunits="insetPixels"/>
			</IconStyle>
			<LabelStyle>
			</LabelStyle>
			<LineStyle>
				<color>ff2dc0fb</color>
				<width>3.2</width>
			</LineStyle>
			<PolyStyle>
				<color>40ffffff</color>
			</PolyStyle>
			<BalloonStyle>
				<displayMode>hide</displayMode>
			</BalloonStyle>
		</Style>
	</gx:CascadingStyle>
	<StyleMap id="__managed_style_039BBB86461AFC91C8F6">
		<Pair>
			<key>normal</key>
			<styleUrl>#__managed_style_160E81DCE21AFC91C8F6</styleUrl>
		</Pair>
		<Pair>
			<key>highlight</key>
			<styleUrl>#__managed_style_278EB2539D1AFC91C8F6</styleUrl>
		</Pair>
	</StyleMap>
	<Placemark id="0D820508251AFC921475">
		<name>RG 01</name>
		<LookAt>
			<longitude>10.74721340792547</longitude>
			<latitude>46.89671690253477</latitude>
			<altitude>2292.347435006008</altitude>
			<heading>0</heading>
			<tilt>0</tilt>
			<gx:fovy>35</gx:fovy>
			<range>4756.012608772726</range>
			<altitudeMode>absolute</altitudeMode>
		</LookAt>
		<styleUrl>#__managed_style_039BBB86461AFC91C8F6</styleUrl>
		<Point>
			<coordinates>10.75506761882441,46.89458390979522,2551.555495554332</coordinates>
		</Point>
	</Placemark>
	<Placemark id="0464F4C33F1AFC946E7A">
		<name>RG 02</name>
		<LookAt>
			<longitude>10.72893785190449</longitude>
			<latitude>46.87391038254119</latitude>
			<altitude>2607.523588815044</altitude>
			<heading>-8.648023523856794e-08</heading>
			<tilt>0.06215544903721643</tilt>
			<gx:fovy>35</gx:fovy>
			<range>949.5206068083644</range>
			<altitudeMode>absolute</altitudeMode>
		</LookAt>
		<styleUrl>#__managed_style_039BBB86461AFC91C8F6</styleUrl>
		<Point>
			<coordinates>10.72709076984391,46.87460481548059,2641.657491406313</coordinates>
		</Point>
	</Placemark>
	<Placemark id="0234B09D6A1AFC95010A">
		<name>RG 03</name>
		<LookAt>
			<longitude>10.71002795016706</longitude>
			<latitude>46.8682756293772</latitude>
			<altitude>2611.274236399393</altitude>
			<heading>-7.131926698813404e-08</heading>
			<tilt>0.06215882627329478</tilt>
			<gx:fovy>35</gx:fovy>
			<range>1297.078814641427</range>
			<altitudeMode>absolute</altitudeMode>
		</LookAt>
		<styleUrl>#__managed_style_039BBB86461AFC91C8F6</styleUrl>
		<Point>
			<coordinates>10.70955471775454,46.86790751686674,2622.786618789376</coordinates>
		</Point>
	</Placemark>
	<Placemark id="0C2CAFE68C1AFC93BB4C">
		<name>RG 04</name>
		<LookAt>
			<longitude>10.7294222611854</longitude>
			<latitude>46.86505584289797</latitude>
			<altitude>2680.709386840936</altitude>
			<heading>-6.668252108979255e-08</heading>
			<tilt>0.06215425600810433</tilt>
			<gx:fovy>35</gx:fovy>
			<range>823.620906900469</range>
			<altitudeMode>absolute</altitudeMode>
		</LookAt>
		<styleUrl>#__managed_style_039BBB86461AFC91C8F6</styleUrl>
		<Point>
			<coordinates>10.72750929220102,46.86456001715089,2729.891959642428</coordinates>
		</Point>
	</Placemark>
	<Placemark id="0A71F520B21AFC9782E9">
		<name>RG 05</name>
		<LookAt>
			<longitude>10.7628686008547</longitude>
			<latitude>46.9012191092032</latitude>
			<altitude>2803.838790648884</altitude>
			<heading>-7.757563770231272e-08</heading>
			<tilt>0.06215465441022604</tilt>
			<gx:fovy>35</gx:fovy>
			<range>880.571791522525</range>
			<altitudeMode>absolute</altitudeMode>
		</LookAt>
		<styleUrl>#__managed_style_039BBB86461AFC91C8F6</styleUrl>
		<Point>
			<coordinates>10.76299799054932,46.90138210452793,2807.377804006284</coordinates>
		</Point>
	</Placemark>
	<Placemark id="088A0E7F191AFC91C8F5">
		<name>RG 06</name>
		<LookAt>
			<longitude>10.71187776261762</longitude>
			<latitude>46.90250998094069</latitude>
			<altitude>2548.872408535696</altitude>
			<heading>0</heading>
			<tilt>0</tilt>
			<gx:fovy>35</gx:fovy>
			<range>4499.487759999465</range>
			<altitudeMode>absolute</altitudeMode>
		</LookAt>
		<styleUrl>#__managed_style_039BBB86461AFC91C8F6</styleUrl>
		<Point>
			<coordinates>10.70122690975131,46.90613432001742,2758.371687044078</coordinates>
		</Point>
	</Placemark>
	<Placemark id="09CF36AA0E1AFC972E01">
		<name>RG 07</name>
		<LookAt>
			<longitude>10.70967155329325</longitude>
			<latitude>46.89875580190065</latitude>
			<altitude>2597.026899352466</altitude>
			<heading>-5.582506317080135e-08</heading>
			<tilt>0.06216296606691536</tilt>
			<gx:fovy>35</gx:fovy>
			<range>1731.851362132584</range>
			<altitudeMode>absolute</altitudeMode>
		</LookAt>
		<styleUrl>#__managed_style_039BBB86461AFC91C8F6</styleUrl>
		<Point>
			<coordinates>10.70655728215801,46.89871914622051,2717.748409602396</coordinates>
		</Point>
	</Placemark>
	<Placemark id="01702AF9C41AFC96413D">
		<name>RG 08</name>
		<LookAt>
			<longitude>10.70157010535962</longitude>
			<latitude>46.87401465815942</latitude>
			<altitude>2535.569214846533</altitude>
			<heading>-1.003770748493532e-07</heading>
			<tilt>0.06215698249187701</tilt>
			<gx:fovy>35</gx:fovy>
			<range>1113.91709401767</range>
			<altitudeMode>absolute</altitudeMode>
		</LookAt>
		<styleUrl>#__managed_style_039BBB86461AFC91C8F6</styleUrl>
		<Point>
			<coordinates>10.70043596077825,46.87397646988446,2549.648613776244</coordinates>
		</Point>
	</Placemark>
	<Placemark id="00392D65251AFC96A0D9">
		<name>RG 09</name>
		<LookAt>
			<longitude>10.69734879377764</longitude>
			<latitude>46.89026725263255</latitude>
			<altitude>2585.792300417956</altitude>
			<heading>-6.948177982583122e-08</heading>
			<tilt>0.06215623076566148</tilt>
			<gx:fovy>35</gx:fovy>
			<range>1038.370728718874</range>
			<altitudeMode>absolute</altitudeMode>
		</LookAt>
		<styleUrl>#__managed_style_039BBB86461AFC91C8F6</styleUrl>
		<Point>
			<coordinates>10.69467917288107,46.8907611287157,2648.678380394295</coordinates>
		</Point>
	</Placemark>
</Document>
</kml>
