# Supplementary material for: Multi-decadal (1953–2017) rock glacier kinematics analysed by high-resolution topographic data in the upper Kaunertal, Austria
Source: Copernicus journal article supplement (doi:10.5194/tc-15-5345-2021), 2021-12-06
Supplement: Supplementary file 1 [file tc-15-5345-2021-supplement.zip › Supplementary.pdf]

**Table S 1. Calculations of the flow velocities of the eight rock glaciers studied. The values were calculated taking into account all measurements (All), above the LoD of the respective epoch and rock glacier (LoD) and above the maximum LoD of all epochs of the respective rock glaciers (maxLoD). Furthermore, a comparative value of the study by Groh & Blöthe (2019) is given for the movement rates in the period between 2001 resp. 2003 and 2015 (G&B). All values are given in the unit m/yr.**

| Name | Epoch* | LoD  | Mean |      |      |        | Median |      |      |        | Max  |      |
|------|--------|------|------|------|------|--------|--------|------|------|--------|------|------|
|      |        |      | All  | LoD  | G&B  | maxLoD | All    | LoD  | G&B  | maxLoD | All  | G&B  |
| RG01 | 1      | 0.03 | 0.39 | 0.42 |      | 0.49   | 0.37   | 0.41 |      | 0.45   | 1.41 |      |
| RG01 | 2      | 0.04 | 0.31 | 0.32 |      | 0.38   | 0.27   | 0.29 |      | 0.33   | 1.19 |      |
| RG01 | 3      | 0.05 | 0.34 | 0.37 |      | 0.39   | 0.30   | 0.34 |      | 0.35   | 1.11 |      |
| RG01 | 4      | 0.08 | 0.43 | 0.52 |      | 0.52   | 0.34   | 0.45 |      | 0.45   | 1.69 |      |
| RG01 | 5      | 0.02 | 0.38 | 0.41 | 0.51 | 0.47   | 0.34   | 0.37 | 0.43 | 0.41   | 1.45 | 1.77 |
| RG01 | 6      | 0.01 | 0.49 | 0.50 |      | 0.60   | 0.45   | 0.47 |      | 0.55   | 1.72 |      |
| RG02 | 1      | 0.03 | 0.04 | 0.08 |      | 0.10   | 0.03   | 0.08 |      | 0.08   | 0.16 |      |
| RG02 | 2      | 0.03 | 0.04 | 0.06 |      | 0.08   | 0.04   | 0.05 |      | 0.08   | 0.16 |      |
| RG02 | 3      | 0.05 | 0.06 | 0.10 |      | 0.11   | 0.05   | 0.09 |      | 0.10   | 0.24 |      |
| RG02 | 4      | 0.06 | 0.14 | 0.21 |      | 0.21   | 0.07   | 0.17 |      | 0.17   | 0.69 |      |
| RG02 | 5      | 0.02 | 0.14 | 0.19 | 0.22 | 0.26   | 0.06   | 0.12 | 0.14 | 0.24   | 0.67 | 0.82 |
| RG02 | 6      | 0.01 | 0.19 | 0.23 |      | 0.34   | 0.07   | 0.10 |      | 0.30   | 0.79 |      |
| RG03 | 1      | 0.03 | 0.07 | 0.13 |      | 0.14   | 0.04   | 0.12 |      | 0.12   | 0.39 |      |
| RG03 | 2      | 0.05 | 0.09 | 0.15 |      | 0.15   | 0.06   | 0.14 |      | 0.14   | 0.43 |      |
| RG03 | 3      | 0.03 | 0.11 | 0.16 |      | 0.20   | 0.07   | 0.17 |      | 0.19   | 0.49 |      |
| RG03 | 4      | 0.06 | 0.17 | 0.28 |      | 0.28   | 0.08   | 0.29 |      | 0.29   | 0.57 |      |
| RG03 | 5      | 0.02 | 0.14 | 0.17 | 0.23 | 0.24   | 0.08   | 0.22 | 0.28 | 0.25   | 0.40 | 0.46 |
| RG03 | 6      | 0.02 | 0.19 | 0.26 |      | 0.34   | 0.08   | 0.29 |      | 0.36   | 0.55 |      |
| RG04 | 1      | 0.03 | 0.06 | 0.10 |      | 0.14   | 0.04   | 0.09 |      | 0.13   | 0.41 |      |
| RG04 | 2      | 0.06 | 0.06 | 0.12 |      | 0.13   | 0.04   | 0.12 |      | 0.12   | 0.25 |      |
| RG04 | 3      | 0.03 | 0.07 | 0.10 |      | 0.14   | 0.05   | 0.08 |      | 0.13   | 0.33 |      |
| RG04 | 4      | 0.07 | 0.08 | 0.14 |      | 0.14   | 0.06   | 0.12 |      | 0.12   | 0.35 |      |
| RG04 | 5      | 0.02 | 0.06 | 0.08 | 0.07 | 0.12   | 0.04   | 0.06 | 0.05 | 0.12   | 0.22 | 0.27 |
| RG04 | 6      | 0.03 | 0.06 | 0.08 |      | 0.12   | 0.04   | 0.07 |      | 0.12   | 0.22 |      |
| RG05 | 1      | 0.02 | 0.08 | 0.09 |      | 0.16   | 0.06   | 0.06 |      | 0.16   | 0.29 |      |
| RG05 | 2      | 0.05 | 0.09 | 0.10 |      | 0.11   | 0.08   | 0.09 |      | 0.10   | 0.27 |      |
| RG05 | 3      | 0.05 | 0.13 | 0.19 |      | 0.24   | 0.06   | 0.12 |      | 0.18   | 0.67 |      |
| RG05 | 4      | 0.07 | 0.12 | 0.19 | 0.31 | 0.19   | 0.08   | 0.14 | 0.28 | 0.14   | 0.83 | 0.81 |

|      |   |      |      |      |      |      |      |      |      |      |           |
|------|---|------|------|------|------|------|------|------|------|------|-----------|
| RG05 | 5 | 0.02 | 0.17 | 0.18 |      | 0.21 | 0.14 | 0.15 |      | 0.17 | 0.65      |
| RG05 | 6 | 0.02 | 0.31 | 0.32 |      | 0.37 | 0.29 | 0.30 |      | 0.34 | 1.28      |
| RG06 | 1 | 0.03 | 0.05 | 0.07 |      | 0.12 | 0.03 | 0.06 |      | 0.11 | 0.41      |
| RG06 | 2 | 0.04 | 0.06 | 0.08 |      | 0.12 | 0.06 | 0.07 |      | 0.11 | 0.34      |
| RG06 | 3 | 0.05 | 0.07 | 0.11 |      | 0.14 | 0.05 | 0.09 |      | 0.13 | 0.57      |
| RG06 | 4 | 0.09 | 0.18 | 0.21 |      | 0.21 | 0.16 | 0.19 |      | 0.19 | 0.57      |
| RG06 | 5 | 0.02 | 0.11 | 0.12 | 0.15 | 0.19 | 0.08 | 0.09 | 0.11 | 0.16 | 0.51 0.56 |
| RG06 | 6 | 0.02 | 0.15 | 0.17 |      | 0.22 | 0.13 | 0.14 |      | 0.18 | 0.66      |
| RG07 | 1 | 0.03 | 0.04 | 0.05 |      | 0.08 | 0.03 | 0.05 |      | 0.08 | 0.09      |
| RG07 | 2 | 0.03 | 0.04 | 0.05 |      | 0.08 | 0.03 | 0.05 |      | 0.08 | 0.09      |
| RG07 | 3 | 0.08 | 0.05 | 0.09 |      | 0.09 | 0.05 | 0.09 |      | 0.09 | 0.13      |
| RG07 | 4 | 0.07 | 0.19 | 0.30 |      | 0.31 | 0.10 | 0.38 |      | 0.39 | 0.53      |
| RG07 | 5 | 0.03 | 0.18 | 0.24 | 0.22 | 0.35 | 0.07 | 0.15 | 0.09 | 0.43 | 0.49 0.74 |
| RG07 | 6 | 0.03 | 0.25 | 0.38 |      | 0.49 | 0.07 | 0.57 |      | 0.63 | 0.80      |
| RG08 | 2 | 0.04 | 0.12 | 0.15 |      | 0.27 | 0.07 | 0.08 |      | 0.09 | 1.15      |
| RG08 | 3 | 0.04 | 0.11 | 0.14 |      | 0.19 | 0.07 | 0.10 |      | 0.12 | 0.77      |
| RG08 | 4 | 0.08 | 0.25 | 0.29 |      | 0.29 | 0.23 | 0.26 |      | 0.26 | 0.89      |
| RG08 | 5 | 0.02 | 0.18 | 0.20 | 0.20 | 0.24 | 0.16 | 0.17 | 0.18 | 0.20 | 0.71 0.80 |
| RG08 | 6 | 0.01 | 0.19 | 0.21 |      | 0.25 | 0.18 | 0.19 |      | 0.22 | 0.71      |

5 \* 1: 1953 – 1970/71; 2: 1970/71 – 1982; 3 1982 – 1997; 4: 1997 – 2006; 5: 2006 – 2012; 6: 2012 – 2017

**Table S 2. Volumetric and surface height change of the individual block glaciers and time slices and the associated error values, which were determined in stable areas. The errors are subdivided into uncorrelated random error (Uncor.), correlated random error (Cor.) and systematic error (Sys.). Combined, these result in the total uncertainty (Total). The equations for the calculation can be found in Anderson (2019).**

| Name | Epoch* | Volumetric [m <sup>3</sup> /yr] |        |        |          |        | Mean surface elevation [m/yr] |        |       |        |       |
|------|--------|---------------------------------|--------|--------|----------|--------|-------------------------------|--------|-------|--------|-------|
|      |        | Change                          | Error  |        |          |        | Change                        | Error  |       |        |       |
|      |        |                                 | Uncor. | Cor.   | Sys.     | Total  |                               | Uncor. | Cor.  | Sys.   | Total |
| RG01 | 1      | -2930.83                        | 11.234 | 18.261 | -434.248 | 434.78 | -0.013                        | 0.000  | 0.000 | -0.002 | 0.002 |
| RG01 | 2      | -5465.71                        | 2.685  | 1.303  | 93.356   | 93.40  | -0.025                        | 0.000  | 0.000 | 0.000  | 0.000 |
| RG01 | 3      | -9217.84                        | 8.735  | 0.000  | -290.581 | 290.71 | -0.042                        | 0.000  | 0.000 | -0.001 | 0.001 |
| RG01 | 4      | -9930.79                        | 5.409  | 0.000  | 56.419   | 56.68  | -0.045                        | 0.000  | 0.000 | 0.000  | 0.000 |
| RG02 | 1      | -83.28                          | 2.972  | 2.243  | -213.013 | 213.05 | -0.002                        | 0.000  | 0.000 | -0.004 | 0.004 |
| RG02 | 2      | 34.84                           | 1.325  | 0.918  | 58.375   | 58.40  | 0.001                         | 0.000  | 0.000 | 0.001  | 0.001 |
| RG02 | 3      | 5.48                            | 3.539  | 0.000  | -31.042  | 31.24  | 0.000                         | 0.000  | 0.000 | -0.001 | 0.001 |
| RG02 | 4      | -234.22                         | 3.747  | 0.000  | -38.373  | 38.56  | -0.005                        | 0.000  | 0.000 | -0.001 | 0.001 |

|      |   |          |       |        |          |        |        |       |       |        |       |
|------|---|----------|-------|--------|----------|--------|--------|-------|-------|--------|-------|
| RG03 | 1 | -267.11  | 1.901 | 1.265  | 8.431    | 8.73   | -0.011 | 0.000 | 0.000 | 0.000  | 0.000 |
| RG03 | 2 | -118.72  | 1.214 | 0.448  | 149.954  | 149.96 | -0.005 | 0.000 | 0.000 | 0.006  | 0.006 |
| RG03 | 3 | -369.35  | 2.430 | 0.000  | 42.720   | 42.79  | -0.015 | 0.000 | 0.000 | 0.002  | 0.002 |
| RG03 | 4 | -527.63  | 3.122 | 0.000  | 30.569   | 30.73  | -0.021 | 0.000 | 0.000 | 0.001  | 0.001 |
| RG04 | 1 | -719.31  | 4.824 | 8.008  | -177.180 | 177.43 | -0.022 | 0.000 | 0.000 | -0.005 | 0.005 |
| RG04 | 2 | -855.47  | 1.151 | 0.936  | 34.682   | 34.71  | -0.026 | 0.000 | 0.000 | 0.001  | 0.001 |
| RG04 | 3 | -1552.80 | 3.642 | 0.000  | -23.882  | 24.16  | -0.047 | 0.000 | 0.000 | -0.001 | 0.001 |
| RG04 | 4 | -1527.13 | 3.986 | 0.000  | -28.992  | 29.26  | -0.046 | 0.000 | 0.000 | -0.001 | 0.001 |
| RG05 | 1 | 235.27   | 4.744 | 6.054  | -120.494 | 120.74 | 0.005  | 0.000 | 0.000 | -0.003 | 0.003 |
| RG05 | 2 | -0.04    | 1.445 | 1.340  | -64.039  | 64.07  | 0.000  | 0.000 | 0.000 | -0.001 | 0.001 |
| RG05 | 3 | -145.94  | 4.895 | 0.000  | 248.577  | 248.63 | -0.003 | 0.000 | 0.000 | 0.005  | 0.005 |
| RG05 | 4 | -694.28  | 3.661 | 0.000  | -47.944  | 48.08  | -0.015 | 0.000 | 0.000 | -0.001 | 0.001 |
| RG06 | 1 | -466.64  | 8.603 | 10.804 | 393.485  | 393.73 | -0.004 | 0.000 | 0.000 | 0.003  | 0.003 |
| RG06 | 2 | -968.07  | 3.132 | 2.769  | 257.536  | 257.57 | -0.009 | 0.000 | 0.000 | 0.002  | 0.002 |
| RG06 | 3 | -2544.06 | 7.035 | 0.000  | 527.778  | 527.83 | -0.022 | 0.000 | 0.000 | 0.005  | 0.005 |
| RG06 | 4 | -3579.38 | 6.286 | 0.000  | -85.272  | 85.50  | -0.032 | 0.000 | 0.000 | -0.001 | 0.001 |
| RG07 | 1 | -36.03   | 2.651 | 3.114  | -13.360  | 13.97  | -0.002 | 0.000 | 0.000 | -0.001 | 0.001 |
| RG07 | 2 | -49.54   | 1.146 | 0.568  | 60.188   | 60.20  | -0.003 | 0.000 | 0.000 | 0.003  | 0.003 |
| RG07 | 3 | -3.25    | 3.200 | 0.000  | -47.960  | 48.07  | 0.000  | 0.000 | 0.000 | -0.003 | 0.003 |
| RG07 | 4 | -50.40   | 2.678 | 0.000  | 9.542    | 9.91   | -0.003 | 0.000 | 0.000 | 0.001  | 0.001 |
| RG08 | 1 | -180.03  | 5.043 | 5.023  | -602.753 | 602.80 | -0.002 | 0.000 | 0.000 | -0.007 | 0.007 |
| RG08 | 2 | -363.60  | 2.205 | 1.491  | -20.248  | 20.42  | -0.004 | 0.000 | 0.000 | 0.000  | 0.000 |
| RG08 | 3 | -1071.66 | 6.037 | 0.000  | 105.870  | 106.04 | -0.013 | 0.000 | 0.000 | 0.001  | 0.001 |
| RG08 | 4 | -1392.12 | 4.324 | 0.000  | 105.057  | 105.15 | -0.017 | 0.000 | 0.000 | 0.001  | 0.001 |
| RG09 | 1 | -714.35  | 4.722 | 4.813  | -188.050 | 188.17 | -0.008 | 0.000 | 0.000 | -0.002 | 0.002 |
| RG09 | 2 | -1596.79 | 1.886 | 1.065  | 14.987   | 15.14  | -0.018 | 0.000 | 0.000 | 0.000  | 0.000 |
| RG09 | 3 | -1807.09 | 6.001 | 0.000  | 70.760   | 71.01  | -0.021 | 0.000 | 0.000 | 0.001  | 0.001 |
| RG09 | 4 | -2027.95 | 4.263 | 0.000  | -93.052  | 93.15  | -0.023 | 0.000 | 0.000 | -0.001 | 0.001 |

\*1: 1953 – 1970/71; 2: 1970/71 – 2006; 3: 2006 – 2012; 4: 2012 – 2017

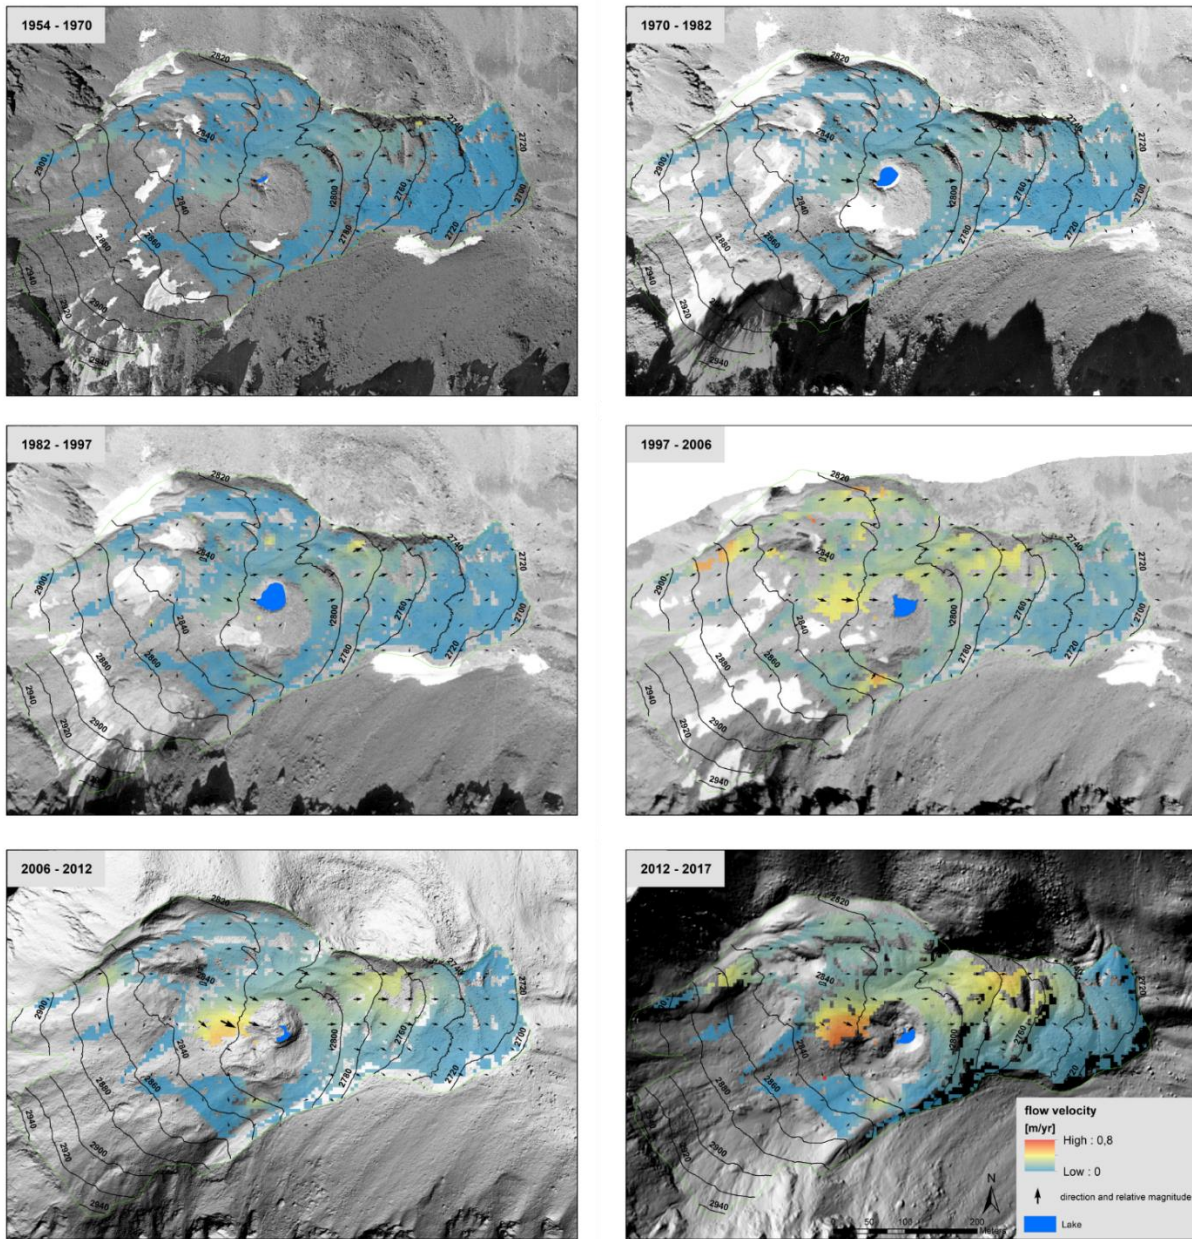

Figure S 1. Development of the thermokast lake on RG 06. The lake changed its extent and position, with a distinct trend regarding its size.

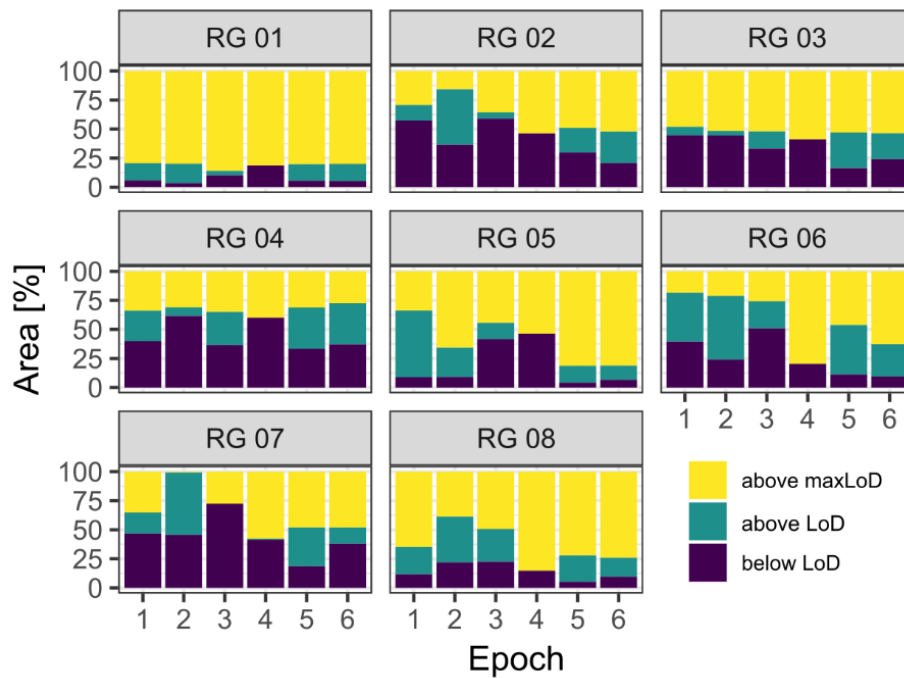

**Figure S 2. Proportional area of the studied rock glaciers below LoD, above LoD and above maxLoD.**

20

## References

Anderson, S. W.: Uncertainty in quantitative analyses of topographic change: error propagation and the role of thresholding, *Earth Surf. Process. Landforms*, 44, 1015–1033, <https://doi.org/10.1002/esp.4551>, 2019.

Groh, T. and Blöthe, J. H.: Rock Glacier Kinematics in the Kaunertal, Ötztal Alps, Austria, *Geosciences*, 9, 373, <https://doi.org/10.3390/geosciences9090373>, 2019.

25
