# Supplementary material for: Multi-decadal (1953–2017) rock glacier kinematics analysed by high-resolution topographic data in the upper Kaunertal, Austria
Source: Copernicus journal article supplement (doi:10.5194/tc-15-5345-2021), 2021-12-06
Supplement: Supplementary file 1 [file tc-15-5345-2021-supplement.zip › tc-15-5345-2021-supplement-title-page.pdf]

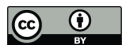

*Supplement of*

**Multi-decadal (1953–2017) rock glacier kinematics analysed by high-resolution topographic data in the upper Kaunertal, Austria**

**Fabian Fleischer et al.**

*Correspondence to:* Fabian Fleischer ([fabian.fleischer@ku.de](mailto:fabian.fleischer@ku.de))

- [tc-15-5345-2021-supplement-title-page.pdf](#)
- [RockGlaciers\\_Fleischer\\_et\\_al\\_2021.kml](#)
- [Supplementary.pdf](#)

The copyright of individual parts of the supplement might differ from the article licence.
